# Supplementary material
Source: HighWire-hosted journal article supplement (https://thorax.bmj.com/content/73/7/634)
Supplement: inline-supplementary-material-1 [file inline-supplementary-material-1.pdf]

**Ventilatory support or respiratory muscle training as adjuncts to exercise in obese CPAP-treated obstructive sleep apnoea patients: a randomized-controlled trial**

(Online Data supplement)

Online data supplement contains 2 tables and 1 figure:

**Table E1:** Unexpected events report

**Table E2:** Dietary intake in the subgroup of patients participating in the Grenoble's Center

**Figure E1:** Changes in peak minute ventilation and Respiratory Rate in the intention-to-treat population

**Table E1:** Unexpected events report

| Center | Patient | group | Unexpected event                                 | Timing   | Dropped out |
|--------|---------|-------|--------------------------------------------------|----------|-------------|
| France | #7      | 2     | Type II diabetes mellitus                        | training | No          |
| France | #12     | 0     | Inguinoscrotal hernia and hypertension treatment | visit #2 | Yes         |
| France | #18     | 1     | Stroke                                           | training | Yes         |
| France | #20     | 2     | Stop training because of ankle fracture          | training | Yes         |
| France | #22     | 2     | Ulnar canal surgery                              | visit #3 | No          |
| France | #26     | 2     | Hospitalization for pericardial effusion         | training | Yes         |
| Canada | #107    | 3     | Evaluations for Narcolepsy                       | visit #2 | Yes         |
| Canada | #128    | 1     | Pneumonia                                        | visit #2 | Yes         |

**Table E2:** Dietary intake in the subgroup of patients participating in the Grenoble's Center

|                                   | ERGO<br>pre   | ERGO<br>post  | p    | ERGO-RMT<br>pre | ERGO-RMT<br>post | p    | ERGO-NIV<br>pre | ERGO-NIV<br>post | p    | Between group<br>p - value<br>Baseline / change |      |
|-----------------------------------|---------------|---------------|------|-----------------|------------------|------|-----------------|------------------|------|-------------------------------------------------|------|
| <b>Total Energy Intake (Kcal)</b> | 2486<br>±1046 | 2373<br>± 660 | 0.75 | 2483<br>± 743   | 2314<br>± 629    | 0.51 | 2885<br>± 1082  | 2645<br>± 1049   | 0.37 | 0.35                                            | 0.89 |
| <b>Protein intake (%)</b>         | 16 ± 4        | 16 ± 1        | 0.93 | 16 ± 4          | 18 ± 3           | 0.16 | 16 ± 4          | 17 ± 3           | 0.48 | 0.56                                            | 0.86 |
| <b>Lipid intake (%)</b>           | 34 ± 4        | 40 ± 1        | 0.32 | 45 ± 5          | 41 ± 6           | 0.48 | 34 ± 9          | 36 ± 9           | 0.37 | 0.02                                            | 0.27 |
| <b>Carbohydrate intake (%)</b>    | 42 ± 6        | 37 ± 2        | 0.32 | 35 ± 7          | 38 ± 3           | 0.50 | 43 ± 8          | 43 ± 8           | 0.84 | 0.07                                            | 0.52 |
| <b>Alcohol (%TEI*)</b>            | 8 ± 7         | 7 ± 4         | 0.32 | 4 ± 5           | 3 ± 4            | 0.60 | 7 ± 9           | 4 ± 4            | 0.18 | 0.90                                            | 0.72 |

Data are mean ± SD. Definition of abbreviations: \*TEI = Theoretical Energetic Intake

**Figure E1:** Panel A shows changes in peak minute ventilation VE (left sticks) and peak Respiratory Rate (RR) (right sticks) in the intention-to-treat population, and Panel B shows changes in peak VE (left sticks) and peak Respiratory Rate (RR) (right sticks) in the per-protocol population. Bars represent standard error. P values are for between-group differences in changes in peak VE or RR.
